# Supplementary material for: Association between in situ ventilation and human-generated aerosol exposure in meatpacking plants during the COVID-19 pandemic
Source: PubMed Central journal article supplement (PMC11651551; doi:10.1371/journal.pone.0314856), 2024-12-17
Supplement: pone.0314856.s001.pdf [file pone.0314856.s001.pdf]

| Site A                                      | Number of Samples | SARS-CoV-2 Detected | SARS-CoV-2 Concentration | Human Surfactant Detected | Human Surfactant Concentration |           |          |         |         |         | CO2 ppm |
|---------------------------------------------|-------------------|---------------------|--------------------------|---------------------------|--------------------------------|-----------|----------|---------|---------|---------|---------|
|                                             |                   |                     |                          |                           | mean                           | std. dev. | Location | ML      | WL      | C       |         |
| Processing and Packing Areas (copies/L air) | 38                | 0 samples           | NA                       | 5 samples                 | mean                           | 2.4E+01   | 7.6E+00  | 6.5E+00 | 7.6E+03 | 6.5E+00 | 2846    |
|                                             |                   | 0%                  | NA                       | 13%                       | std. dev.                      | 4.1E+01   | 1.3E+01  | 1.1E+01 | 7.1E+02 | 8.9E+00 | 1118    |
| Harvest Areas (copies/L air)                | 12                | 0 samples           | NA                       | 2 samples                 | mean                           | 1.9E+01   | 1.3E+01  |         |         |         | 2138    |
|                                             |                   | 0%                  | NA                       | 17%                       | std. dev.                      | 2.0E+01   | 2.3E+01  |         |         |         | 1519    |
| Cafeterias (copies/L air)                   | 14                | 0 samples           | NA                       | 3 samples                 | mean                           | 1.3E+01   | 1.8E+01  | 1.6E+01 |         |         | 1565    |
|                                             |                   | 0%                  | NA                       | 21%                       | std. dev.                      | 2.3E+01   | 3.1E+01  | 2.8E+01 |         |         | 323     |
| Common Areas (copies/L air)                 | 15                | 0 samples           | NA                       | 2 samples                 | mean                           | 1.5E+01   | 3.0E+01  |         |         |         | 1426    |
|                                             |                   | 0%                  | NA                       | 13%                       | std. dev.                      | 1.3E+01   | 3.5E+01  |         |         |         | 847     |
|                                             |                   |                     |                          |                           | Location                       | ML        | WL       |         |         |         |         |
| Long Term Samples (total copies)            | 6                 | 0 samples           | NA                       | 2 samples                 | mean                           | 3.0E+04   | 1.2E+04  |         |         |         |         |
|                                             |                   | 0%                  | NA                       | 33%                       | std. dev.                      | 3.0E+04   | 1.1E+04  |         |         |         |         |
|                                             |                   |                     |                          |                           | Location                       | ML        | C        |         |         |         |         |
