# Supplementary material for: Association between in situ ventilation and human-generated aerosol exposure in meatpacking plants during the COVID-19 pandemic
Source: PubMed Central journal article supplement (PMC11651551; doi:10.1371/journal.pone.0314856), 2024-12-17
Supplement: pone.0314856.s002.pdf [file pone.0314856.s002.pdf]

| Site B                                      | Number of Samples | SARS-CoV-2 Detected | SARS-CoV-2 Concentration | Human Surfactant Detected | Human Surfactant Concentration |                 |         |         |         |          |
|---------------------------------------------|-------------------|---------------------|--------------------------|---------------------------|--------------------------------|-----------------|---------|---------|---------|----------|
| Processing and Packing Areas (copies/L air) | 36                | 0 samples           | NA                       | 0 samples                 | <b>mean</b>                    |                 |         |         |         | 1160.924 |
|                                             |                   | 0%                  | NA                       | 0%                        | <b>std. dev.</b>               |                 |         |         |         | 148.5414 |
| Harvest Areas (copies/L air)                | 12                | 0 samples           | NA                       | 1 sample                  | <b>mean</b>                    | 9.4E+00         |         |         |         | 530.0417 |
|                                             |                   | 0%                  | NA                       | 8%                        | <b>std. dev.</b>               | 1.6E+01         |         |         |         | 52.00211 |
| Cafeterias (copies/L air)                   | 12                | 0 samples           | NA                       | 1 sample                  | <b>mean</b>                    | 5.8E+00         |         |         |         | 689.25   |
|                                             |                   | 0%                  | NA                       | 8%                        | <b>std. dev.</b>               | 1.0E+01         |         |         |         | 104.6832 |
| Common Areas (copies/L air)                 | 12                | 0 samples           | NA                       | 4 samples                 | <b>mean</b>                    | 5.2E+00         | 3.5E+00 | 4.2E+00 | 3.8E+00 | 800.25   |
|                                             |                   | 0%                  | NA                       | 33%                       | <b>std. dev.</b>               | 8.9E+00         | 6.0E+00 | 7.3E+00 | 6.6E+00 |          |
|                                             |                   |                     |                          |                           |                                | <b>Location</b> | MH      | MH      | ML      | WL       |
| Long Term Samples (total copies)            | 6                 | 0 samples           | NA                       | 0 samples                 | <b>mean</b>                    |                 |         |         |         |          |
|                                             |                   | 0%                  | NA                       | 0%                        | <b>std. dev.</b>               |                 |         |         |         |          |
