# Supplementary material for: Association between in situ ventilation and human-generated aerosol exposure in meatpacking plants during the COVID-19 pandemic
Source: PubMed Central journal article supplement (PMC11651551; doi:10.1371/journal.pone.0314856), 2024-12-17
Supplement: pone.0314856.s003.pdf [file pone.0314856.s003.pdf]

| Site C                                      | Number of Samples | SARS-CoV-2 Detected | SARS-CoV-2 Concentration | Human Surfactant Detected | Human Surfactant Concentration |           |          |         |         |         |         | CO2 ppm  |
|---------------------------------------------|-------------------|---------------------|--------------------------|---------------------------|--------------------------------|-----------|----------|---------|---------|---------|---------|----------|
|                                             |                   |                     |                          |                           | mean                           | std. dev. | Location | ME      | MH      | ML      | ME      |          |
| Processing and Packing Areas (copies/L air) | 30                | 0 samples           | NA                       | 5 samples                 | mean                           | 5.3E+00   | 7.0E+00  | 2.3E+01 | 9.1E-01 | 5.2E+00 |         | 5257.146 |
|                                             |                   | NA                  | NA                       | 17%                       | std. dev.                      | 9.1E+00   | 1.2E+01  | 3.9E+01 | 1.6E+00 | 9.0E+00 |         | 1498.728 |
| Harvest Areas (copies/L air)                | 30                | 0 samples           | NA                       | 4 samples                 | mean                           | 3.8E+00   | 8.2E+00  | 3.0E+00 | 2.8E+00 |         |         | 562.661  |
|                                             |                   | 0%                  | NA                       | 13%                       | std. dev.                      | 6.5E+00   | 1.4E+01  | 5.1E+00 | 4.9E+00 |         |         | 94.60747 |
| Cafeterias (copies/L air)                   | 15                | 0 samples           | NA                       | 3 samples                 | mean                           | 3.1E+00   | 4.1E+00  | 7.8E-01 |         |         |         | 1028.769 |
|                                             |                   | NA                  | NA                       | 20%                       | std. dev.                      | 5.5E+00   | 7.2E+00  | 1.4E+00 |         |         |         | 852.847  |
| Common Areas (copies/L air)                 | 15                | 0 samples           | NA                       | 6 samples                 | mean                           | 7.9E+00   | 2.1E+00  | 3.5E+00 | 1.6E+01 | 1.2E+00 | 7.2E-01 | 1504.125 |
|                                             |                   | NA                  | NA                       | 40%                       | std. dev.                      | 7.0E+00   | 3.6E+00  | 6.1E+00 | 1.5E+01 | 2.0E+00 | 1.3E+00 |          |
|                                             |                   |                     |                          |                           | Location                       | ME        | MH       | ML      | ME      | MH      | WL      |          |
| Long Term Samples (total copies)            | 7                 | 1 samples           | 9.7E+05                  | 5 samples                 | mean                           | 2.9E+03   | 1.0E+05  | 6.8E+03 | 7.2E+03 | 1.7E+04 |         |          |
|                                             |                   | 14%                 | 4.37E+05                 | 71%                       | std. dev.                      | 2.5E+03   | 1.0E+05  | 1.2E+04 | 6.5E+03 | 1.9E+04 |         |          |
|                                             |                   | Location            | ML                       |                           | Location                       | WL        | ML       | MH      | ME      | C       |         |          |
